# Supplementary material for: Evaluation of Strategies to Fight COVID-19: The French Paradigm
Source: MDPI journal article supplement (doi:10.3390/jcm10132942), 2021-06-30
Supplement: s1 [file s1]

### **Supplementary data**

**Title:** Evaluation of strategies to fight COVID-19: The French paradigm

### **Author list:**

Audrey GIRAUD-GATINEAU<sup>1,2,3,4</sup> (PhD student); Philippe GAUTRET<sup>1,2</sup> (MD, PhD);  
Philippe COLSON<sup>1,5</sup>; Hervé CHAUDET<sup>1,2,3</sup> (MD); Didier RAOULT<sup>1,5\*</sup> (MD, PhD)

### **Affiliations:**

<sup>1</sup> IHU Méditerranée Infection, 19-21 boulevard Jean Moulin, 13005 Marseille, France;

<sup>2</sup> Aix Marseille Univ., Institut de Recherche pour le Développement (IRD), Assistance Publique – Hôpitaux de Marseille (AP-HM), Service de Santé des Armées (SSA), Vecteurs – Infections Tropicales et Méditerranéennes (VITROME), Marseille, France;

<sup>3</sup> French Armed Forces Center for Epidemiology and Public Health (CESPA), Service de Santé des Armées (SSA), Marseille, France;

<sup>4</sup> Assistance Publique- Hôpitaux de Marseille (AP-HM), Marseille, France;

<sup>5</sup> Aix-Marseille Univ., Institut de Recherche pour le Développement (IRD), Assistance Publique - Hôpitaux de Marseille (AP-HM), Microbes Evolution Phylogeny and Infections (MEPHI), 27 boulevard Jean Moulin, 13005 Marseille, France;

\* Corresponding author: Didier Raoult, IHU Méditerranée Infection, 19-21 boulevard Jean Moulin, 13005 Marseille, France. Tel.: +33 413 732 401; Fax: +33 413 732 402; email: didier.raoult@gmail.com

**Key words:** COVID-19; SARS-CoV-2; France; deaths; Marseille; Paris

## Supplementary data S1

| Deaths from all causes among people living in the Sud region | 2018  | 2019  | 2020  |
|--------------------------------------------------------------|-------|-------|-------|
| <b>January</b>                                               | 5207  | 5137  | 4781  |
| <b>% excess</b>                                              | -8,2  | -6,9  |       |
| <b>February</b>                                              | 4361  | 4732  | 4256  |
| <b>% excess</b>                                              | -2,4  | -10,1 |       |
| <b>March</b>                                                 | 4707  | 4480  | 4852  |
| <b>% excess</b>                                              | 3,1   | 8,3   |       |
| <b>April</b>                                                 | 4040  | 4047  | 4725  |
| <b>% excess</b>                                              | 17,0  | 16,8  |       |
| <b>May</b>                                                   | 3945  | 3977  | 3956  |
| <b>% excess</b>                                              | 0,3   | -0,5  |       |
| <b>June</b>                                                  | 3767  | 3846  | 3893  |
| <b>% excess</b>                                              | 3,3   | 1,2   |       |
| <b>July</b>                                                  | 3958  | 4060  | 3982  |
| <b>% excess</b>                                              | 0,6   | -1,9  |       |
| <b>August</b>                                                | 4191  | 3988  | 4052  |
| <b>% excess</b>                                              | -3,3  | 1,6   |       |
| <b>TOTAL Jan-Aug</b>                                         | 34176 | 34267 | 34497 |
| <b>Excess deaths/2020</b>                                    | 321   | 230   |       |
| <b>% excess</b>                                              | 0,9   | 0,7   |       |

| Deaths from all causes among people living in Grand-Est | 2018  | 2019  | 2020  |
|---------------------------------------------------------|-------|-------|-------|
| <b>January</b>                                          | 5164  | 5165  | 4986  |
| <b>% excess</b>                                         | -3,4  | -3,5  |       |
| <b>February</b>                                         | 4608  | 4846  | 4583  |
| <b>% excess</b>                                         | -0,5  | -5,4  |       |
| <b>March</b>                                            | 5641  | 4772  | 7057  |
| <b>% excess</b>                                         | 25,1  | 47,9  |       |
| <b>April</b>                                            | 4445  | 4288  | 7081  |
| <b>% excess</b>                                         | 59,3  | 65,1  |       |
| <b>May</b>                                              | 4078  | 4269  | 4282  |
| <b>% excess</b>                                         | 5,0   | 0,3   |       |
| <b>June</b>                                             | 3818  | 4030  | 4033  |
| <b>% excess</b>                                         | 5,6   | 0,1   |       |
| <b>July</b>                                             | 4346  | 4182  | 4028  |
| <b>% excess</b>                                         | -7,3  | -3,7  |       |
| <b>August</b>                                           | 4094  | 4102  | 4294  |
| <b>% excess</b>                                         | 4,9   | 4,7   |       |
| <b>TOTAL Jan-Aug</b>                                    | 36194 | 35654 | 40344 |
| <b>Excess deaths/2020</b>                               | 4150  | 4690  |       |
| <b>% excess</b>                                         | 11,5  | 13,2  |       |

| Deaths from all causes among people living in Ile-de-France | 2018  | 2019  | 2020  |
|-------------------------------------------------------------|-------|-------|-------|
| <b>January</b>                                              | 7366  | 7642  | 7163  |
| <b>% excess</b>                                             | -2,8  | -6,3  |       |
| <b>February</b>                                             | 6442  | 6879  | 6277  |
| <b>% excess</b>                                             | -2,6  | -8,8  |       |
| <b>March</b>                                                | 7291  | 6388  | 9746  |
| <b>% excess</b>                                             | 33,7  | 52,6  |       |
| <b>April</b>                                                | 6117  | 6030  | 14221 |
| <b>% excess</b>                                             | 132,5 | 135,8 |       |
| <b>May</b>                                                  | 6032  | 6008  | 6569  |
| <b>% excess</b>                                             | 8,9   | 9,3   |       |
| <b>June</b>                                                 | 5584  | 5826  | 5747  |
| <b>% excess</b>                                             | 2,9   | -1,4  |       |
| <b>July</b>                                                 | 6052  | 6051  | 5629  |
| <b>% excess</b>                                             | -7,0  | -7,0  |       |
| <b>August</b>                                               | 5502  | 5732  | 6000  |
| <b>% excess</b>                                             | 9,1   | 4,7   |       |
| <b>TOTAL Jan-Aug</b>                                        | 50386 | 50556 | 61352 |
| <b>Excess deaths/2020</b>                                   | 10966 | 10796 |       |
| <b>% excess</b>                                             | 21,8  | 21,4  |       |

| Deaths from all causes among people living in New-Aquitaine | 2018  | 2019  | 2020  |
|-------------------------------------------------------------|-------|-------|-------|
| <b>January</b>                                              | 6188  | 6552  | 6115  |
| <b>% excess</b>                                             | -1,2  | -6,7  |       |
| <b>February</b>                                             | 5726  | 5947  | 5492  |
| <b>% excess</b>                                             | -4,1  | -7,7  |       |
| <b>March</b>                                                | 6463  | 5703  | 5978  |
| <b>% excess</b>                                             | -7,5  | 4,8   |       |
| <b>April</b>                                                | 5442  | 5271  | 5304  |
| <b>% excess</b>                                             | -2,5  | 0,6   |       |
| <b>May</b>                                                  | 5128  | 5321  | 5018  |
| <b>% excess</b>                                             | -2,1  | -5,7  |       |
| <b>June</b>                                                 | 4964  | 4970  | 4864  |
| <b>% excess</b>                                             | -2,0  | -2,1  |       |
| <b>July</b>                                                 | 5120  | 5085  | 5100  |
| <b>% excess</b>                                             | -0,4  | 0,3   |       |
| <b>August</b>                                               | 4986  | 4942  | 4971  |
| <b>% excess</b>                                             | -0,3  | 0,6   |       |
| <b>TOTAL Jan-Aug</b>                                        | 44017 | 43791 | 42842 |
| <b>Excess deaths/2020</b>                                   | -1175 | -949  |       |
| <b>% excess</b>                                             | -2,7  | -2,2  |       |

## Supplementary data S2

| Deaths from all causes in<br>public or private<br>hospitals among people<br>living in the Sud region | 2 018  | 2 019  | 2 020  |
|------------------------------------------------------------------------------------------------------|--------|--------|--------|
| <b>January</b>                                                                                       | 2 679  | 2 666  | 2 486  |
| <b>% excess</b>                                                                                      | -7     | -7     |        |
| <b>February</b>                                                                                      | 2 203  | 2 420  | 2 197  |
| <b>% excess</b>                                                                                      | 0      | -9     |        |
| <b>March</b>                                                                                         | 2 392  | 2 327  | 2 080  |
| <b>% excess</b>                                                                                      | -13    | -11    |        |
| <b>April</b>                                                                                         | 2 078  | 2 156  | 2 070  |
| <b>% excess</b>                                                                                      | 0      | -4     |        |
| <b>May</b>                                                                                           | 2 106  | 2 032  | 1 865  |
| <b>% excess</b>                                                                                      | -11    | -8     |        |
| <b>June</b>                                                                                          | 2 009  | 2 029  | 1 924  |
| <b>% excess</b>                                                                                      | -4     | -5     |        |
| <b>July</b>                                                                                          | 2 079  | 2 106  | 1 995  |
| <b>% excess</b>                                                                                      | -4     | -5     |        |
| <b>August</b>                                                                                        | 2 149  | 2 048  | 2 039  |
| <b>% excess</b>                                                                                      | -5     | 0      |        |
| <b>TOTAL Jan-Aug</b>                                                                                 | 17 695 | 17 784 | 16 656 |
| <b>Excess deaths/2020</b>                                                                            | -1 039 | -1 128 |        |
| <b>% excess</b>                                                                                      | -5,9   | -6,3   |        |

| Deaths from all causes in<br>public or private<br>hospitals among people<br>living in Grand-Est | 2 018  | 2 019  | 2 020  |
|-------------------------------------------------------------------------------------------------|--------|--------|--------|
| <b>January</b>                                                                                  | 3 016  | 2 899  | 2 822  |
| <b>% excess</b>                                                                                 | -6     | -3     |        |
| <b>February</b>                                                                                 | 2 685  | 2 799  | 2 580  |
| <b>% excess</b>                                                                                 | -4     | -8     |        |
| <b>March</b>                                                                                    | 3 195  | 2 741  | 3 928  |
| <b>% excess</b>                                                                                 | 23     | 43     |        |
| <b>April</b>                                                                                    | 2 538  | 2 459  | 3 632  |
| <b>% excess</b>                                                                                 | 43     | 48     |        |
| <b>May</b>                                                                                      | 2 363  | 2 464  | 2 269  |
| <b>% excess</b>                                                                                 | -4     | -8     |        |
| <b>June</b>                                                                                     | 2 298  | 2 368  | 2 235  |
| <b>% excess</b>                                                                                 | -3     | -6     |        |
| <b>July</b>                                                                                     | 2 580  | 2 427  | 2 208  |
| <b>% excess</b>                                                                                 | -14    | -9     |        |
| <b>August</b>                                                                                   | 2 424  | 2 377  | 2 442  |
| <b>% excess</b>                                                                                 | 1      | 3      |        |
| <b>TOTAL Jan-Sep 7</b>                                                                          | 21 099 | 20 534 | 22 116 |
| <b>Excess deaths/2020</b>                                                                       | 1 017  | 1 582  |        |

| Deaths from all causes in<br>public or private<br>hospitals among people<br>living in Ile-de-France | 2 018  | 2 019  | 2 020  |
|-----------------------------------------------------------------------------------------------------|--------|--------|--------|
| <b>January</b>                                                                                      | 4 421  | 4 642  | 4 344  |
| <b>% excess</b>                                                                                     | -2     | -6     |        |
| <b>February</b>                                                                                     | 3 923  | 4 135  | 3 859  |
| <b>% excess</b>                                                                                     | -2     | -7     |        |
| <b>March</b>                                                                                        | 4 356  | 3 899  | 5 624  |
| <b>% excess</b>                                                                                     | 29     | 44     |        |
| <b>April</b>                                                                                        | 3 701  | 3 766  | 7 388  |
| <b>% excess</b>                                                                                     | 100    | 96     |        |
| <b>May</b>                                                                                          | 3 757  | 3 621  | 3 787  |
| <b>% excess</b>                                                                                     | 1      | 5      |        |
| <b>June</b>                                                                                         | 3 518  | 3 643  | 3 418  |
| <b>% excess</b>                                                                                     | -3     | -6     |        |
| <b>July</b>                                                                                         | 3 744  | 3 750  | 3 397  |
| <b>% excess</b>                                                                                     | -9     | -9     |        |
| <b>August</b>                                                                                       | 3 370  | 3 589  | 3 595  |
| <b>% excess</b>                                                                                     | 7      | 0      |        |
| <b>TOTAL Jan-Aug</b>                                                                                | 30 790 | 31 045 | 35 412 |
| <b>Excess deaths/2020</b>                                                                           | 4 622  | 4 367  |        |
| <b>% excess</b>                                                                                     | 15,0   | 14,1   |        |

| Deaths from all causes in<br>public or private<br>hospitals among people<br>living in New-Aquitaine | 2 018  | 2 019  | 2 020  |
|-----------------------------------------------------------------------------------------------------|--------|--------|--------|
| <b>January</b>                                                                                      | 3 169  | 3 277  | 3 141  |
| <b>% excess</b>                                                                                     | -1     | -4     |        |
| <b>February</b>                                                                                     | 2 942  | 2 946  | 2 823  |
| <b>% excess</b>                                                                                     | -4     | -4     |        |
| <b>March</b>                                                                                        | 3 253  | 2 855  | 2 944  |
| <b>% excess</b>                                                                                     | -9     | 3      |        |
| <b>April</b>                                                                                        | 2 749  | 2 643  | 2 461  |
| <b>% excess</b>                                                                                     | -10    | -7     |        |
| <b>May</b>                                                                                          | 2 660  | 2 810  | 2 451  |
| <b>% excess</b>                                                                                     | -8     | -13    |        |
| <b>June</b>                                                                                         | 2 532  | 2 650  | 2 469  |
| <b>% excess</b>                                                                                     | -2     | -7     |        |
| <b>July</b>                                                                                         | 2 641  | 2 608  | 2 545  |
| <b>% excess</b>                                                                                     | -4     | -2     |        |
| <b>August</b>                                                                                       | 2 539  | 2 477  | 2 588  |
| <b>% excess</b>                                                                                     | 2      | 4      |        |
| <b>TOTAL Jan-Aug</b>                                                                                | 22 485 | 22 266 | 21 422 |
| <b>Excess deaths/2020</b>                                                                           | -1 063 | -844   |        |

% excess 4,8 7,7  
Supplementary data S3

| Deaths from all causes in hospice or among dependent elderly residents in retirement homes in the Sud region | 2018 | 2019  | 2020 |
|--------------------------------------------------------------------------------------------------------------|------|-------|------|
| <b>January</b>                                                                                               | 630  | 587   | 593  |
| <b>% excess</b>                                                                                              | -5,9 | 1,0   |      |
| <b>February</b>                                                                                              | 513  | 621   | 468  |
| <b>% excess</b>                                                                                              | -8,8 | -24,6 |      |
| <b>March</b>                                                                                                 | 605  | 520   | 612  |
| <b>% excess</b>                                                                                              | 1,2  | 17,7  |      |
| <b>April</b>                                                                                                 | 466  | 464   | 701  |
| <b>% excess</b>                                                                                              | 50,4 | 51,1  |      |
| <b>May</b>                                                                                                   | 443  | 507   | 433  |
| <b>% excess</b>                                                                                              | -2,3 | -14,6 |      |
| <b>June</b>                                                                                                  | 397  | 469   | 456  |
| <b>% excess</b>                                                                                              | 14,9 | -2,8  |      |
| <b>July</b>                                                                                                  | 448  | 458   | 453  |
| <b>% excess</b>                                                                                              | 1,1  | -1,1  |      |
| <b>August</b>                                                                                                | 479  | 509   | 455  |
| <b>% excess</b>                                                                                              | -5,0 | -10,6 |      |
| <b>TOTAL Jan-Aug</b>                                                                                         | 3981 | 4135  | 4171 |
| <b>Excess deaths/2020</b>                                                                                    | 190  | 36    |      |
| <b>% excess</b>                                                                                              | 4,8  | 0,9   |      |

| Deaths from all causes in hospice or among dependent elderly residents in retirement homes in Grand-Est | 2018  | 2019  | 2020 |
|---------------------------------------------------------------------------------------------------------|-------|-------|------|
| <b>January</b>                                                                                          | 679   | 718   | 695  |
| <b>% excess</b>                                                                                         | 2,4   | -3,2  |      |
| <b>February</b>                                                                                         | 640   | 680   | 671  |
| <b>% excess</b>                                                                                         | 4,8   | -1,3  |      |
| <b>March</b>                                                                                            | 896   | 693   | 1144 |
| <b>% excess</b>                                                                                         | 27,7  | 65,1  |      |
| <b>April</b>                                                                                            | 659   | 587   | 1466 |
| <b>% excess</b>                                                                                         | 122,5 | 149,7 |      |
| <b>May</b>                                                                                              | 597   | 539   | 687  |
| <b>% excess</b>                                                                                         | 15,1  | 27,5  |      |
| <b>June</b>                                                                                             | 486   | 500   | 605  |
| <b>% excess</b>                                                                                         | 24,5  | 21,0  |      |
| <b>July</b>                                                                                             | 562   | 582   | 632  |
| <b>% excess</b>                                                                                         | 12,5  | 8,6   |      |
| <b>August</b>                                                                                           | 559   | 563   | 641  |
| <b>% excess</b>                                                                                         | 14,7  | 13,9  |      |
| <b>TOTAL Jan-Aug</b>                                                                                    | 5078  | 4862  | 6541 |
| <b>Excess deaths/2020</b>                                                                               | 1463  | 1679  |      |

% excess -4,7 -3,8

| Deaths from all causes in hospice or among dependent elderly residents in retirement homes in Ile-de-France | 2018  | 2019  | 2020 |
|-------------------------------------------------------------------------------------------------------------|-------|-------|------|
| <b>January</b>                                                                                              | 786   | 771   | 693  |
| <b>% excess</b>                                                                                             | -11,8 | -10,1 |      |
| <b>February</b>                                                                                             | 680   | 711   | 625  |
| <b>% excess</b>                                                                                             | -8,1  | -12,1 |      |
| <b>March</b>                                                                                                | 860   | 635   | 1210 |
| <b>% excess</b>                                                                                             | 40,7  | 90,6  |      |
| <b>April</b>                                                                                                | 645   | 573   | 2695 |
| <b>% excess</b>                                                                                             | 317,8 | 370,3 |      |
| <b>May</b>                                                                                                  | 597   | 625   | 728  |
| <b>% excess</b>                                                                                             | 21,9  | 16,5  |      |
| <b>June</b>                                                                                                 | 517   | 539   | 589  |
| <b>% excess</b>                                                                                             | 13,9  | 9,3   |      |
| <b>July</b>                                                                                                 | 576   | 551   | 553  |
| <b>% excess</b>                                                                                             | -4,0  | 0,4   |      |
| <b>August</b>                                                                                               | 535   | 547   | 596  |
| <b>% excess</b>                                                                                             | 11,4  | 9,0   |      |
| <b>TOTAL Jan-Aug</b>                                                                                        | 5196  | 4952  | 7689 |
| <b>Excess deaths/2020</b>                                                                                   | 2493  | 2737  |      |
| <b>% excess</b>                                                                                             | 48,0  | 55,3  |      |

| Deaths from all causes in hospice or among dependent elderly residents in retirement homes in New-Aquitaine | 2018  | 2019  | 2020 |
|-------------------------------------------------------------------------------------------------------------|-------|-------|------|
| <b>January</b>                                                                                              | 989   | 1010  | 961  |
| <b>% excess</b>                                                                                             | -2,8  | -4,9  |      |
| <b>February</b>                                                                                             | 889   | 935   | 829  |
| <b>% excess</b>                                                                                             | -6,7  | -11,3 |      |
| <b>March</b>                                                                                                | 1056  | 863   | 944  |
| <b>% excess</b>                                                                                             | -10,6 | 9,4   |      |
| <b>April</b>                                                                                                | 852   | 813   | 940  |
| <b>% excess</b>                                                                                             | 10,3  | 15,6  |      |
| <b>May</b>                                                                                                  | 773   | 747   | 781  |
| <b>% excess</b>                                                                                             | 1,0   | 4,6   |      |
| <b>June</b>                                                                                                 | 790   | 653   | 799  |
| <b>% excess</b>                                                                                             | 1,1   | 22,4  |      |
| <b>July</b>                                                                                                 | 757   | 700   | 836  |
| <b>% excess</b>                                                                                             | 10,4  | 19,4  |      |
| <b>August</b>                                                                                               | 753   | 752   | 766  |
| <b>% excess</b>                                                                                             | 1,7   | 1,9   |      |
| <b>TOTAL Jan-Aug</b>                                                                                        | 6859  | 6473  | 6856 |
| <b>Excess deaths/2020</b>                                                                                   | -3    | 383   |      |

% excess 28,8 34,5

% excess 0,0 5,9

Supplementary data S4

| Deaths from all causes<br>at home among people<br>living in the Sud region | 2018  | 2019  | 2020  |
|----------------------------------------------------------------------------|-------|-------|-------|
| <b>January</b>                                                             | 1500  | 1459  | 1320  |
| <b>% excess</b>                                                            | -12,0 | -9,5  |       |
| <b>February</b>                                                            | 1245  | 1345  | 1206  |
| <b>% excess</b>                                                            | -3,1  | -10,3 |       |
| <b>March</b>                                                               | 1313  | 1291  | 1348  |
| <b>% excess</b>                                                            | 2,7   | 4,4   |       |
| <b>April</b>                                                               | 1161  | 1117  | 1504  |
| <b>% excess</b>                                                            | 29,5  | 34,6  |       |
| <b>May</b>                                                                 | 1109  | 1122  | 1307  |
| <b>% excess</b>                                                            | 17,9  | 16,5  |       |
| <b>June</b>                                                                | 1075  | 1066  | 1209  |
| <b>% excess</b>                                                            | 12,5  | 13,4  |       |
| <b>July</b>                                                                | 1096  | 1156  | 1211  |
| <b>% excess</b>                                                            | 10,5  | 4,8   |       |
| <b>August 24th</b>                                                         | 1222  | 1103  | 1213  |
| <b>% excess</b>                                                            | -0,7  | 10,0  |       |
| <b>TOTAL Jan-Aug</b>                                                       | 9721  | 9659  | 10318 |
| <b>Excess deaths/2020</b>                                                  | 597   | 659   |       |
| <b>% excess</b>                                                            | 6,1   | 6,8   |       |

| Deaths from all causes<br>at home among people<br>living in Grand-Est | 2018 | 2019 | 2020 |
|-----------------------------------------------------------------------|------|------|------|
| <b>January</b>                                                        | 1176 | 1220 | 1115 |
| <b>% excess</b>                                                       | -5,2 | -8,6 |      |
| <b>February</b>                                                       | 1043 | 1070 | 1006 |
| <b>% excess</b>                                                       | -3,5 | -6,0 |      |
| <b>March</b>                                                          | 1245 | 1044 | 1542 |
| <b>% excess</b>                                                       | 23,9 | 47,7 |      |
| <b>April</b>                                                          | 1027 | 988  | 1560 |
| <b>% excess</b>                                                       | 51,9 | 57,9 |      |
| <b>May</b>                                                            | 871  | 950  | 1016 |
| <b>% excess</b>                                                       | 16,6 | 6,9  |      |
| <b>June</b>                                                           | 795  | 907  | 958  |
| <b>% excess</b>                                                       | 20,5 | 5,6  |      |
| <b>July</b>                                                           | 941  | 893  | 920  |
| <b>% excess</b>                                                       | -2,2 | 3,0  |      |
| <b>August 24th</b>                                                    | 881  | 904  | 945  |
| <b>% excess</b>                                                       | 7,3  | 4,5  |      |
| <b>TOTAL Jan-Sep 7</b>                                                | 7979 | 7976 | 9062 |
| <b>Excess of deaths/2020</b>                                          | 1083 | 1086 |      |
| <b>% excess</b>                                                       | 13,6 | 13,6 |      |

| Deaths from all causes<br>at home among people<br>living in Ile-de-France | 2018  | 2019  | 2020  |
|---------------------------------------------------------------------------|-------|-------|-------|
| <b>January</b>                                                            | 1626  | 1675  | 1604  |
| <b>% excess</b>                                                           | -1,4  | -4,2  |       |
| <b>February</b>                                                           | 1388  | 1517  | 1342  |
| <b>% excess</b>                                                           | -3,3  | -11,5 |       |
| <b>March</b>                                                              | 1564  | 1410  | 2256  |
| <b>% excess</b>                                                           | 44,2  | 60,0  |       |
| <b>April</b>                                                              | 1319  | 1312  | 3220  |
| <b>% excess</b>                                                           | 144,1 | 145,4 |       |
| <b>May</b>                                                                | 1233  | 1341  | 1554  |
| <b>% excess</b>                                                           | 26,0  | 15,9  |       |
| <b>June</b>                                                               | 1106  | 1212  | 1308  |
| <b>% excess</b>                                                           | 18,3  | 7,9   |       |
| <b>July</b>                                                               | 1259  | 1244  | 1209  |
| <b>% excess</b>                                                           | -4,0  | -2,8  |       |
| <b>August 24th</b>                                                        | 1179  | 1132  | 1300  |
| <b>% excess</b>                                                           | 10,3  | 14,8  |       |
| <b>TOTAL Jan-Aug</b>                                                      | 10674 | 10843 | 13793 |
| <b>Excess deaths/2020</b>                                                 | 3119  | 2950  |       |
| <b>% excess</b>                                                           | 29,2  | 27,2  |       |

| Deaths from all causes<br>at home among people<br>living in New-Aquitaine | 2018  | 2019  | 2020  |
|---------------------------------------------------------------------------|-------|-------|-------|
| <b>January</b>                                                            | 1536  | 1634  | 1470  |
| <b>% excess</b>                                                           | -4,3  | -10,0 |       |
| <b>February</b>                                                           | 1485  | 1532  | 1319  |
| <b>% excess</b>                                                           | -11,2 | -13,9 |       |
| <b>March</b>                                                              | 1644  | 1394  | 1603  |
| <b>% excess</b>                                                           | -2,5  | 15,0  |       |
| <b>April</b>                                                              | 1364  | 1271  | 1470  |
| <b>% excess</b>                                                           | 7,8   | 15,7  |       |
| <b>May</b>                                                                | 1245  | 1254  | 1380  |
| <b>% excess</b>                                                           | 10,8  | 10,0  |       |
| <b>June</b>                                                               | 1228  | 1180  | 1229  |
| <b>% excess</b>                                                           | 0,1   | 4,2   |       |
| <b>July</b>                                                               | 1240  | 1209  | 1319  |
| <b>% excess</b>                                                           | 6,4   | 9,1   |       |
| <b>August 24th</b>                                                        | 1189  | 1212  | 1241  |
| <b>% excess</b>                                                           | 4,4   | 2,4   |       |
| <b>TOTAL Jan-Sep 7</b>                                                    | 10931 | 10686 | 11031 |
| <b>Excess of deaths/2020</b>                                              | 100   | 345   |       |
| <b>% excess</b>                                                           | 0,9   | 3,2   |       |

Supplementary table S1 – Age classes of COVID-19-associated fatalities at IHU Méditerranée Infection, at AP-HM, in French regions and in France overall.

|                                   | <b>0-9</b><br>N (%) | <b>9-19</b><br>N (%) | <b>20-29</b><br>N (%) | <b>30-39</b><br>N (%) | <b>40-49</b><br>N (%) | <b>50-59</b><br>N (%) | <b>60-69</b><br>N (%) | <b>70-79</b><br>N (%) | <b>80-89</b><br>N (%) | <b>90 and<br/>more</b><br>N (%) | <b>TOTAL</b> |
|-----------------------------------|---------------------|----------------------|-----------------------|-----------------------|-----------------------|-----------------------|-----------------------|-----------------------|-----------------------|---------------------------------|--------------|
| <b>IHU Méditerranée Infection</b> | 0 (0)               | 0 (0)                | 0 (0)                 | 0 (0)                 | 0 (0)                 | 1 (2.3)               | 2 (4.7)               | 14 (32.6)             | 18 (41.9)             | 8 (18.6)                        | 43           |
| <b>AP-HM total</b>                | 0 (0)               | 0 (0)                | 0 (0)                 | 0 (0)                 | 0 (0)                 | 4 (3.1)               | 12 (9.2)              | 33 (25.4)             | 49 (37.7)             | 32 (24.6)                       | 130          |
| <b>Auvergne – Rhône-Alpes</b>     | 0 (0)               | 0 (0)                | 1 (0.1)               | 4 (0.2)               | 12 (0.7)              | 44 (2.6)              | 130 (7.8)             | 340 (20.4)            | 705 (42.4)            | 428 (25.7)                      | 1,664        |
| <b>Bourgogne-Franche-Comté</b>    | 0 (0)               | 0 (0)                | 0 (0)                 | 3 (0.3)               | 6 (0.6)               | 25 (2.5)              | 86 (8.5)              | 207 (20.5)            | 448 (44.3)            | 236 (23.3)                      | 1,011        |
| <b>Bretagne</b>                   | 0 (0)               | 0 (0)                | 0 (0)                 | 0 (0)                 | 1 (0.4)               | 8 (3.2)               | 28 (11.1)             | 52 (20.6)             | 93 (36.9)             | 70 (27.8)                       | 252          |
| <b>Centre – Val de Loire</b>      | 0 (0)               | 0 (0)                | 1 (0.2)               | 2 (0.4)               | 3 (0.6)               | 13 (2.6)              | 37 (7.3)              | 86 (16.9)             | 200 (39.4)            | 166 (32.7)                      | 508          |
| <b>Corse</b>                      | 0 (0)               | 0 (0)                | 0 (0)                 | 0 (0)                 | 1 (1.7)               | 1 (1.7)               | 2 (3.4)               | 16 (27.7)             | 25 (43.1)             | 13 (22.4)                       | 58           |
| <b>Grand-Est</b>                  | 1 (0.03)            | 0 (0)                | 2 (0.1)               | 16 (0.5)              | 35 (1.0)              | 98 (2.9)              | 366 (10.7)            | 851 (24.8)            | 1,391 (40.6)          | 669 (19.5)                      | 3,429        |
| <b>Hauts-de-France</b>            | 0 (0)               | 0 (0)                | 1 (0.1)               | 4 (0.2)               | 12 (0.7)              | 70 (4.0)              | 231 (13.3)            | 378 (21.7)            | 688 (39.6)            | 354 (20.4)                      | 1,738        |
| <b>Ile-de-France</b>              | 2 (0.03)            | 3 (0.04)             | 12 (0.2)              | 49 (0.7)              | 132 (1.9)             | 503 (7.1)             | 1,039 (14.7)          | 1,665 (23.5)          | 2,272 (32.0)          | 1,412 (19.9)                    | 7,089        |
| <b>Normandie</b>                  | 0 (0)               | 0 (0)                | 0 (0)                 | 2 (0.5)               | 10 (2.4)              | 16 (3.8)              | 56 (13.3)             | 93 (22.1)             | 163 (38.8)            | 80 (19.0)                       | 420          |
| <b>New-Aquitaine</b>              | 0 (0)               | 0 (0)                | 2 (0.5)               | 2 (0.5)               | 2 (0.5)               | 13 (3.3)              | 38 (9.5)              | 90 (22.6)             | 152 (38.2)            | 99 (24.9)                       | 398          |
| <b>Occitanie</b>                  | 0 (0)               | 0 (0)                | 1 (0.1)               | 1 (0.1)               | 3 (0.3)               | 17 (1.9)              | 58 (6.4)              | 102 (11.3)            | 191 (21.1)            | 124 (13.7)                      | 497          |
| <b>Sud</b>                        | 0 (0)               | 0 (0)                | 1 (0.1)               | 1 (0.1)               | 4 (0.4)               | 35 (3.9)              | 75 (8.3)              | 188 (20.8)            | 378 (41.8)            | 222 (24.6)                      | 904          |
| <b>Pays de la Loire</b>           | 0 (0)               | 0 (0)                | 0 (0)                 | 0 (0)                 | 4 (0.9)               | 13 (2.9)              | 46 (10.4)             | 80 (18.1)             | 182 (41.3)            | 116 (26.3)                      | 441          |
| <b>France</b>                     | 3 (0.02)            | 3 (0.02)             | 21 (0.1)              | 84 (0.5)              | 229 (1.2)             | 861 (4.7)             | 2,203 (11.9)          | 4,165 (22.6)          | 6,902 (37.4)          | 3,991 (21.6)                    | 18,462       |

Supplementary table S2 – COVID-19-associated fatalities in patients under 60 years of age.

|                                   | < 60 years<br>N (%) | ≥ 60 years<br>N (%)  | TOTAL         |
|-----------------------------------|---------------------|----------------------|---------------|
| <b>IHU Méditerranée Infection</b> | 1 (2.3)             | 42 (97.7)            | 43            |
| <b>AP-HM total</b>                | 4 (3.1)             | 126 (96.9)           | 130           |
| <b>Auvergne – Rhône-Alpes</b>     | 61 (3.7)            | 1,603 (96.3)         | 1,664         |
| <b>Bourgogne-Franche-Comté</b>    | 34 (3.4)            | 977 (96.6)           | 1,011         |
| <b>Bretagne</b>                   | 9 (3.6)             | 243 (96.4)           | 252           |
| <b>Centre – Val de Loire</b>      | 19 (3.7)            | 489 (96.3)           | 508           |
| <b>Corse</b>                      | 2 (3.4)             | 56 (96.6)            | 58            |
| <b>Grand-Est</b>                  | 152 (4.4)           | 3,277 (95.6)         | 3,429         |
| <b>Hauts-de-France</b>            | 87 (5.0)            | 1,651 (95.0)         | 1,738         |
| <b>Ile-de-France</b>              | 701 (9.9)           | 6,388 (90.1)         | 7,089         |
| <b>Normandie</b>                  | 28 (6.7)            | 392 (93.3)           | 420           |
| <b>New-Aquitaine</b>              | 19 (4.8)            | 379 (95.2)           | 398           |
| <b>Occitanie</b>                  | 22 (4.4)            | 475 (95.6)           | 497           |
| <b>Sud</b>                        | 41 (4.5)            | 863 (95.5)           | 904           |
| <b>Pays de la Loire</b>           | 17 (3.9)            | 424 (96.1)           | 441           |
| <b>France</b>                     | <b>1,201 (6.5)</b>  | <b>17,261 (93.5)</b> | <b>18,462</b> |
